# Supplementary material for: Precedence of Bone Loss Accompanied with Changes in Body Composition and Body Fat Distribution in Patients with Type 2 Diabetes Mellitus
Source: J Diabetes Res. 2023 Apr 17;2023:6753403. doi: 10.1155/2023/6753403 (PMC10125744; doi:10.1155/2023/6753403)
Supplement: Supplementary Materials — Table S1: body composition index and constituent ratio in 596 T2DM patients before and after follow-up. Table S2.1: linear regression analysis of body composition index and L1-4BMD. Table S2.2: linear regression analysis of body composition index and FNBMD. Table S3.1: frequency of body mass index and body composition index. Table S3.2: binary logistic regression analysis of body mass index, body composition index, and FNBMD reduction. [file 6753403.f1.zip]

Archive with 5 entries (5 files):
- Supplementary Table (1) Body composition index and constituent ratio (1).docx
- Supplementary Table (2.1) body composition Index and L1-4BMD (1).docx
- Supplementary Table (2.2) body composition Index and FNBMD (1).docx
- Supplementary Table (3.1) Frequency of body mass index, body composition index (1).docx
- Supplementary Table (3.2) Body mass index, body composition index and FNBMD reduction (1).docx
